# Supplementary material for: Design and Early Implementation Successes and Challenges of a Pharmacogenetics Consult Clinic
Source: PubMed Central journal article supplement (PMC7408871; doi:10.3390/jcm9072274), 2020-07-17
Supplement: jcm-09-02274-s001.pdf [file jcm-09-02274-s001.pdf]

**Table S1: Pharmacogenetic testing processes.**

|                                             | Testing Platform                                                                                                                                     | Gene Tested          | Alleles Tested <sup>4</sup>                                                                                                                                |
|---------------------------------------------|------------------------------------------------------------------------------------------------------------------------------------------------------|----------------------|------------------------------------------------------------------------------------------------------------------------------------------------------------|
| UF Health Pathology Laboratory <sup>1</sup> | Luminex xTAG<br>CYP2D6 Kit v3<br><br>(Luminex Corporation,<br>Austin, TX)                                                                            | CYP2D6 <sup>3</sup>  | *2, *3, *4, *5, *6, *7, *8, *9, *10 *11, *15, *17, *29, *35, *41, CYP2D6 gene rearrangements associated with the deletion (*5) and duplication genotypes   |
|                                             | eSensor XT-8<br><br>(GenMark Diagnostics,<br>Carlsbad, CA)                                                                                           | CYP2C19 <sup>3</sup> | *2, *3, *4, *5, *6, *7, *8, *9, *10, *13, *17                                                                                                              |
|                                             | GatorPGx panel <sup>2</sup><br><br>QuantStudio 12K Flex Real<br>Time PCR System<br><br>(Applied Biosystems by<br>Life Technologies,<br>Carlsbad, CA) | CYP2D6               | *2, *2A, *3, *4, *5, *6, *7, *8, *9, *10, *17, *29, *41, rs1135840, CYP2D6 gene rearrangements associated with the deletion (*5) and duplication genotypes |
|                                             |                                                                                                                                                      | CYP2C19              | 2, *3, *4, *6, *8, *10, *17                                                                                                                                |
|                                             |                                                                                                                                                      | CYP3A5               | *3, *6, *7                                                                                                                                                 |
|                                             |                                                                                                                                                      | CYP2C9               | *2, *3, *5, *6, *8, *11                                                                                                                                    |
|                                             |                                                                                                                                                      | CYP2C9 cluster       | rs12777823                                                                                                                                                 |
|                                             |                                                                                                                                                      | CYP4F2               | V433M                                                                                                                                                      |
|                                             |                                                                                                                                                      | VKORC1               | c.-1639G>A                                                                                                                                                 |
|                                             |                                                                                                                                                      | TPMT                 | *2, *3A, *3B, *3C                                                                                                                                          |
|                                             |                                                                                                                                                      | NUDT15               | *3                                                                                                                                                         |
| SLCO1B1                                     | *5                                                                                                                                                   |                      |                                                                                                                                                            |

<sup>1</sup> College of American Pathologists-accredited and Clinical Laboratory Improvement Amendments-licensed (CAP/CLIA) clinical laboratory in Gainesville, Florida.

<sup>2</sup> The pharmacist collected buccal samples from the patient for testing on the QuantStudio platform. GatorPGx panel was launched in July 2019.

<sup>3</sup> Upon clinic launch in September 2017, an offsite phlebotomist collected blood samples from the patient for CYP2D6 and CYP2C19 testing on the Luminex and GenMark platforms, respectively. At this time, the Luminex platform was validated for blood and buccal samples for CYP2D6 testing, however, the GenMark platform was only validated for blood sample collection for CYP2C19 testing. Once the GenMark platform was validated for buccal samples in October 2017, the pharmacist began collecting buccal brush samples from the patient during the first visit for both CYP2C19 and CYP2D6 testing.

<sup>4</sup> CYP2C19 and CYP2D6 genotypes were translated into phenotypes based on guidance at the time from the Clinical Pharmacogenetics Implementation Consortium (CPIC).[1]

**Table S2: CYP2D6 phenotype translation.[2,3]**

|                                                                                                                                                                                                                                                                                                                                                                                                                       |                                     |
|-----------------------------------------------------------------------------------------------------------------------------------------------------------------------------------------------------------------------------------------------------------------------------------------------------------------------------------------------------------------------------------------------------------------------|-------------------------------------|
| <b>Step 1:</b> Determined patient's activity score from <i>CYP2D6</i> genotype by determining the activity score of each allele present and adding the score together. In the case where a duplication was present, the total score was calculated twice, once with one allele duplicated and once with the other allele duplicated to account for both possibilities (resulting in a ranged phenotype). <sup>1</sup> |                                     |
| <b>Allele</b>                                                                                                                                                                                                                                                                                                                                                                                                         | <b>Activity Score</b>               |
| *3, *4, *5, *6, *7, *8, *11, *15                                                                                                                                                                                                                                                                                                                                                                                      | 0                                   |
| *9, *10, *17, *29, *41                                                                                                                                                                                                                                                                                                                                                                                                | 0.5                                 |
| *1, *2, *35                                                                                                                                                                                                                                                                                                                                                                                                           | 1                                   |
| <b>Step 2:</b> Determined if patient was taking a CYP2D6 inhibitor [2,4], and multiplied the activity score calculated from step 1 by the applicable factor shown below. If patient was prescribed multiple inhibitors, the strongest inhibitor was used in this calculation.                                                                                                                                         |                                     |
| <b>CYP2D6 inhibitor</b>                                                                                                                                                                                                                                                                                                                                                                                               | <b>Multiple activity score by:</b>  |
| Strong inhibitor <sup>2</sup>                                                                                                                                                                                                                                                                                                                                                                                         | 0                                   |
| Moderate inhibitor                                                                                                                                                                                                                                                                                                                                                                                                    | 0.5                                 |
| Weak inhibitor                                                                                                                                                                                                                                                                                                                                                                                                        | N/A                                 |
| <b>Step 3:</b> Determined patient's phenotype from the calculated activity score from step 2 as shown below.                                                                                                                                                                                                                                                                                                          |                                     |
| <b>Calculated Activity Score</b>                                                                                                                                                                                                                                                                                                                                                                                      | <b>CYP2D6 Phenotype<sup>3</sup></b> |
| >2                                                                                                                                                                                                                                                                                                                                                                                                                    | UM                                  |
| 1->2                                                                                                                                                                                                                                                                                                                                                                                                                  | NM-UM                               |
| 1-2                                                                                                                                                                                                                                                                                                                                                                                                                   | NM                                  |
| 0.25-0.75                                                                                                                                                                                                                                                                                                                                                                                                             | IM                                  |
| 0.5-2                                                                                                                                                                                                                                                                                                                                                                                                                 | IM-NM                               |
| 0                                                                                                                                                                                                                                                                                                                                                                                                                     | PM                                  |

UM: ultra-rapid metabolizer; NM-UM: normal to ultra-rapid metabolizer; NM: normal metabolizer; IM: intermediate metabolizer; IM-NM: intermediate to normal metabolizer; PM: poor metabolizer.

<sup>1</sup> Ranged CYP2D6 phenotypes were possible because the assay used did not indicate the exact number of alleles present or which allele was duplicated. For instance, *CYP2D6*\*1/\*4 duplication would translate to CYP2D6 normal to ultra-rapid metabolizer (NM-UM), because this genotype could result in a NM phenotype if the patient's \*41 allele was duplicated and a UM phenotype if the patient's \*1 allele was duplicated. Patients with a CYP2D6 NM-UM phenotype were treated conservatively as possible UM.

<sup>2</sup> Based on information the pharmacist collected from the patient on their history of response to current and/or past CYP2D6 substrates, the above translation method was not used if the patient with a total activity score >2 was taking a strong inhibitor and appeared to have a predicted phenotype other than PM (in light of being unable to determine exact number of *CYP2D6* copies). In this scenario, the pharmacist instead estimated the CYP2D6 phenotype based on clinical picture, assuming that patient did not undergo complete phenoconversion to PM. For example, if a patient who was taking bupropion (strong CYP2D6 inhibitor) and hydrocodone/ acetaminophen

(CYP2D6 substrate) reported having an exaggerated response to hydrocodone (e.g., severe opioid-induced pruritis and 50% reduction in pain) instead of the expected lack of pain relief common with PM, the pharmacist would estimate a phenotype of CYP2D6 NM-UM for the patient in this case. If CYP2D6 phenotype prediction was not possible based on patient's clinical picture, the phenotype was denoted as "Indeterminate".

<sup>3</sup> This CYP2D6 genotype to phenotype translation represents the guidance at the time (i.e., September 2017-2019) from CPIC [1], prior to their translation standardization with the Dutch Pharmacogenetics Working Group (DPWG) [5].

**Table S3:** Patients' current and planned medications<sup>1</sup> that could be guided by CYP2C19 and CYP2D6 testing, along with number of recommendations suggesting that physicians consider a change in medication/dose and number of accepted recommendations.

| Current/ Planned Medications <sup>1</sup> | Medication Class                                 | Medications              | Number of genotype-guided <sup>1</sup> medications (n=123) | Number of recommendations <sup>2</sup> (n=62) | Number of accepted recommendations (n=54) |
|-------------------------------------------|--------------------------------------------------|--------------------------|------------------------------------------------------------|-----------------------------------------------|-------------------------------------------|
| Current                                   | <b>Medications impacted by CYP2C19</b>           |                          |                                                            |                                               |                                           |
|                                           | SSRI                                             | citalopram               | 1                                                          | 0                                             | N/A                                       |
|                                           |                                                  | escitalopram             | 7                                                          | 2                                             | 2                                         |
|                                           |                                                  | sertraline               | 10                                                         | 5                                             | 4                                         |
|                                           | PPI                                              | dexlansoprazole          | 1                                                          | 0                                             | N/A                                       |
|                                           |                                                  | esomeprazole             | 3                                                          | 4                                             | 4                                         |
|                                           |                                                  | omeprazole               | 22                                                         | 11                                            | 9                                         |
|                                           |                                                  | pantoprazole             | 15                                                         | 10                                            | 8                                         |
|                                           |                                                  | rabeprazole              | 1                                                          | 0                                             | N/A                                       |
|                                           | Antiplatelet                                     | clopidogrel              | 1                                                          | 0                                             | N/A                                       |
|                                           | <b>Medications impacted by CYP2D6</b>            |                          |                                                            |                                               |                                           |
|                                           | Antipsychotic                                    | aripiprazole             | 2                                                          | 1                                             | 1                                         |
|                                           | SNRI                                             | venlafaxine              | 7                                                          | 2                                             | 2                                         |
|                                           | SSRI                                             | paroxetine               | 1                                                          | 1                                             | 1                                         |
|                                           | Opioid                                           | tramadol                 | 7                                                          | 2                                             | 2                                         |
|                                           |                                                  | hydrocodone/ APAP        | 2                                                          | 2                                             | 2                                         |
|                                           |                                                  | hydrocodone/ homatropine | 1                                                          | 0                                             | N/A                                       |
| oxycodone (IR/ER)                         |                                                  | 4                        | 1                                                          | 1                                             |                                           |
| oxycodone/ acetaminophen                  |                                                  | 3                        | 1                                                          | 0                                             |                                           |
| 5HT3 Receptor Antagonist                  | ondansetron                                      | 6                        | 0                                                          | N/A                                           |                                           |
| Planned                                   | <b>Medications impacted by CYP2C19 or CYP2D6</b> |                          |                                                            |                                               |                                           |
|                                           | Antidepressant/ Antipsychotic                    | —                        | 28                                                         | 20                                            | 18                                        |
|                                           | PPI                                              | —                        | 1                                                          | 0                                             | N/A                                       |

5HT3: serotonin type 3; PGx: pharmacogenetic; PPI proton pump inhibitor; SNRI serotonin-norepinephrine reuptake inhibitor; SSRI: selective serotonin reuptake inhibitor.

<sup>1</sup> Current/ planned medications that could be impacted by *CYP2C19* and/or *CYP2D6* per CPIC and/or DPWG guidelines [3,6-9]: SSRIs except fluoxetine, venlafaxine, aripiprazole, PPIs, opioids (i.e., codeine, tramadol, hydrocodone, oxycodone), clopidogrel, ondansetron.

<sup>2</sup> Excluded 2 patients with recommendations who were lost to follow-up with their physician.

## References

1. Relling, M.V.; Klein, T.E. CPIC: Clinical Pharmacogenetics Implementation Consortium of the Pharmacogenomics Research Network. *Clinical pharmacology and therapeutics* **2011**, *89*, 464-467, doi:10.1038/clpt.2010.279.
2. U.S. Food and Drug Administration. Drug Development and Drug Interactions: Table of Substrates, Inhibitors and Inducers. Available online: <http://www.fda.gov/Drugs/DevelopmentApprovalProcess/DevelopmentResources/DrugInteractionsLabeling/ucm093664.htm> (accessed on 1 December 2019).
3. Crews, K.R.; Gaedigk, A.; Dunnenberger, H.M.; Leeder, J.S.; Klein, T.E.; Caudle, K.E.; Haidar, C.E.; Shen, D.D.; Callaghan, J.T.; Sadhasivam, S., et al. Clinical Pharmacogenetics Implementation Consortium guidelines for cytochrome P450 2D6 genotype and codeine therapy: 2014 update. *Clinical pharmacology and therapeutics* **2014**, *95*, 376-382, doi:10.1038/clpt.2013.254.
4. Storelli, F.; Matthey, A.; Lenglet, S.; Thomas, A.; Desmeules, J.; Daali, Y. Impact of CYP2D6 Functional Allelic Variations on Phenoconversion and Drug-Drug Interactions. *Clinical pharmacology and therapeutics* **2018**, *104*, 148-157, doi:10.1002/cpt.889.
5. Caudle, K.E.; Sangkuhl, K.; Whirl-Carrillo, M.; Swen, J.J.; Haidar, C.E.; Klein, T.E.; Gammal, R.S.; Relling, M.V.; Scott, S.A.; Hertz, D.L., et al. Standardizing CYP2D6 Genotype to Phenotype Translation: Consensus Recommendations from the Clinical Pharmacogenetics Implementation Consortium and Dutch Pharmacogenetics Working Group. *Clin Transl Sci* **2020**, *13*, 116-124, doi:10.1111/cts.12692.
6. Hicks, J.K.; Bishop, J.R.; Sangkuhl, K.; Muller, D.J.; Ji, Y.; Leckband, S.G.; Leeder, J.S.; Graham, R.L.; Chiulli, D.L.; A, L.L., et al. Clinical Pharmacogenetics Implementation Consortium (CPIC) Guideline for CYP2D6 and CYP2C19 Genotypes and Dosing of Selective Serotonin Reuptake Inhibitors. *Clinical pharmacology and therapeutics* **2015**, *98*, 127-134, doi:10.1002/cpt.147.
7. Swen, J.J.; Nijenhuis, M.; de Boer, A.; Grandia, L.; Maitland-van der Zee, A.H.; Mulder, H.; Rongen, G.A.; van Schaik, R.H.; Schalekamp, T.; Touw, D.J., et al. Pharmacogenetics: from bench to byte--an update of guidelines. *Clinical pharmacology and therapeutics* **2011**, *89*, 662-673, doi:10.1038/clpt.2011.34.
8. Scott, S.A.; Sangkuhl, K.; Stein, C.M.; Hulot, J.S.; Mega, J.L.; Roden, D.M.; Klein, T.E.; Sabatine, M.S.; Johnson, J.A.; Shuldiner, A.R. Clinical Pharmacogenetics Implementation Consortium guidelines for CYP2C19 genotype and clopidogrel therapy: 2013 update. *Clinical pharmacology and therapeutics* **2013**, *94*, 317-323, doi:10.1038/clpt.2013.105.

9. Bell, G.C.; Caudle, K.E.; Whirl-Carrillo, M.; Gordon, R.J.; Hikino, K.; Prows, C.A.; Gaedigk, A.; Agundez, J.; Sadhasivam, S.; Klein, T.E., et al. Clinical Pharmacogenetics Implementation Consortium (CPIC) guideline for CYP2D6 genotype and use of ondansetron and tropisetron. *Clinical pharmacology and therapeutics* **2017**, *102*, 213-218, doi:10.1002/cpt.598.
